# Supplementary material
Source: PubMed Central journal article supplement (PMC4681851)

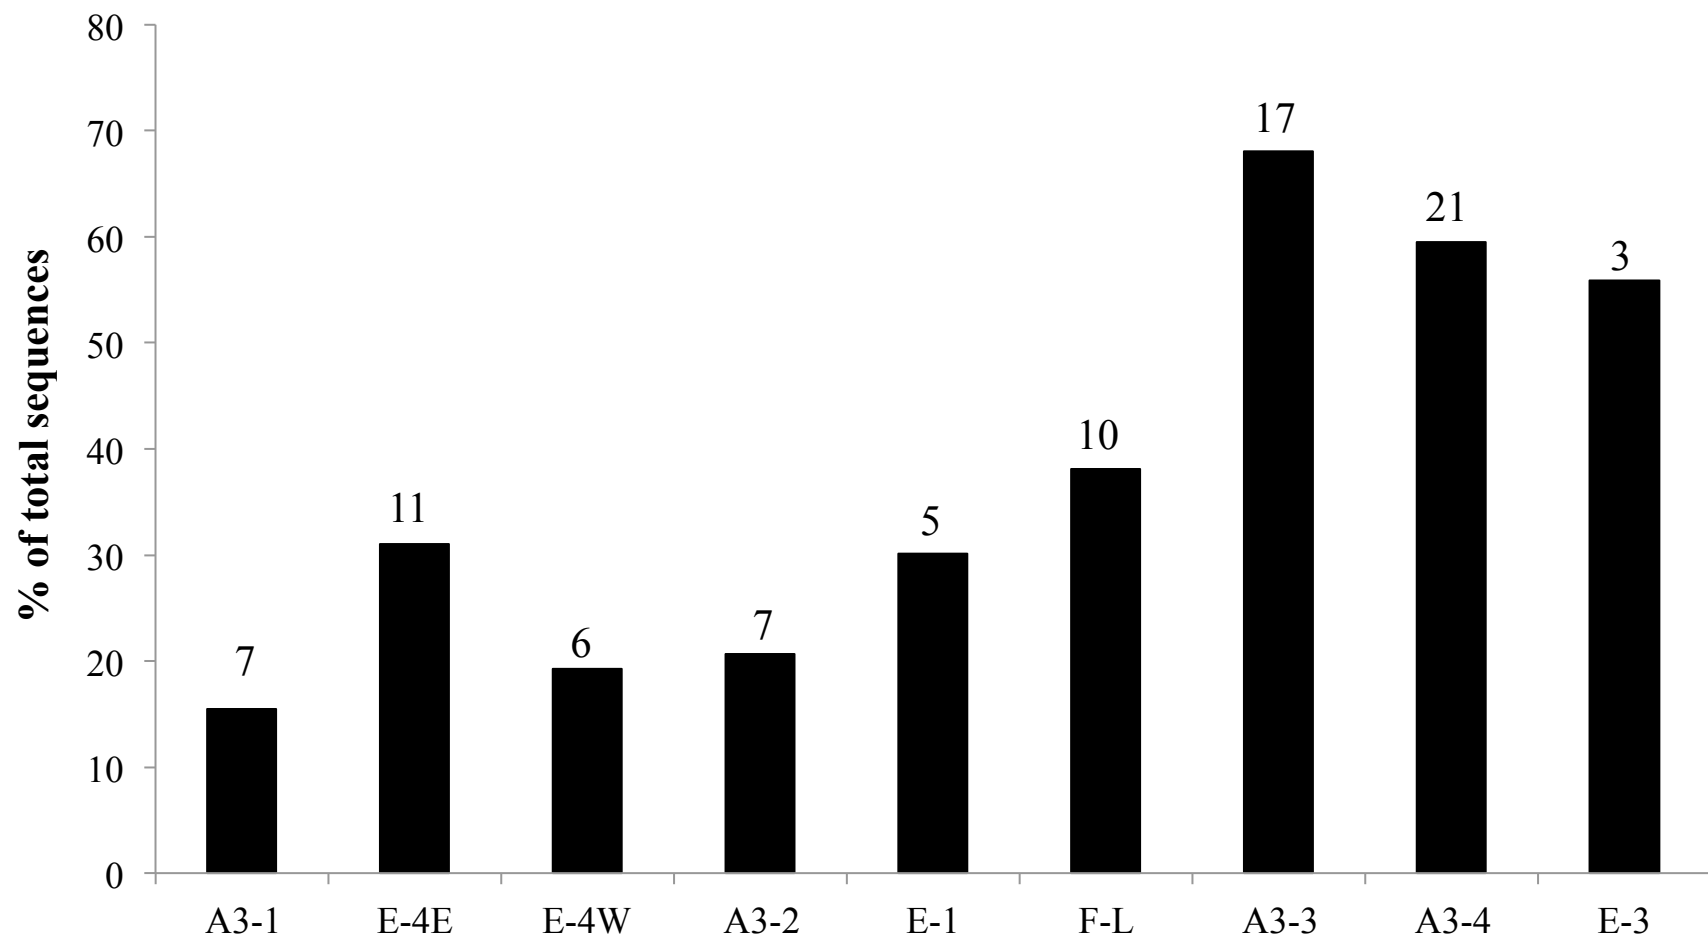

Supplement: ismej2015105x10.pdf [file ismej2015105x10.pdf]

# Proteobacteria

Fig. S4a

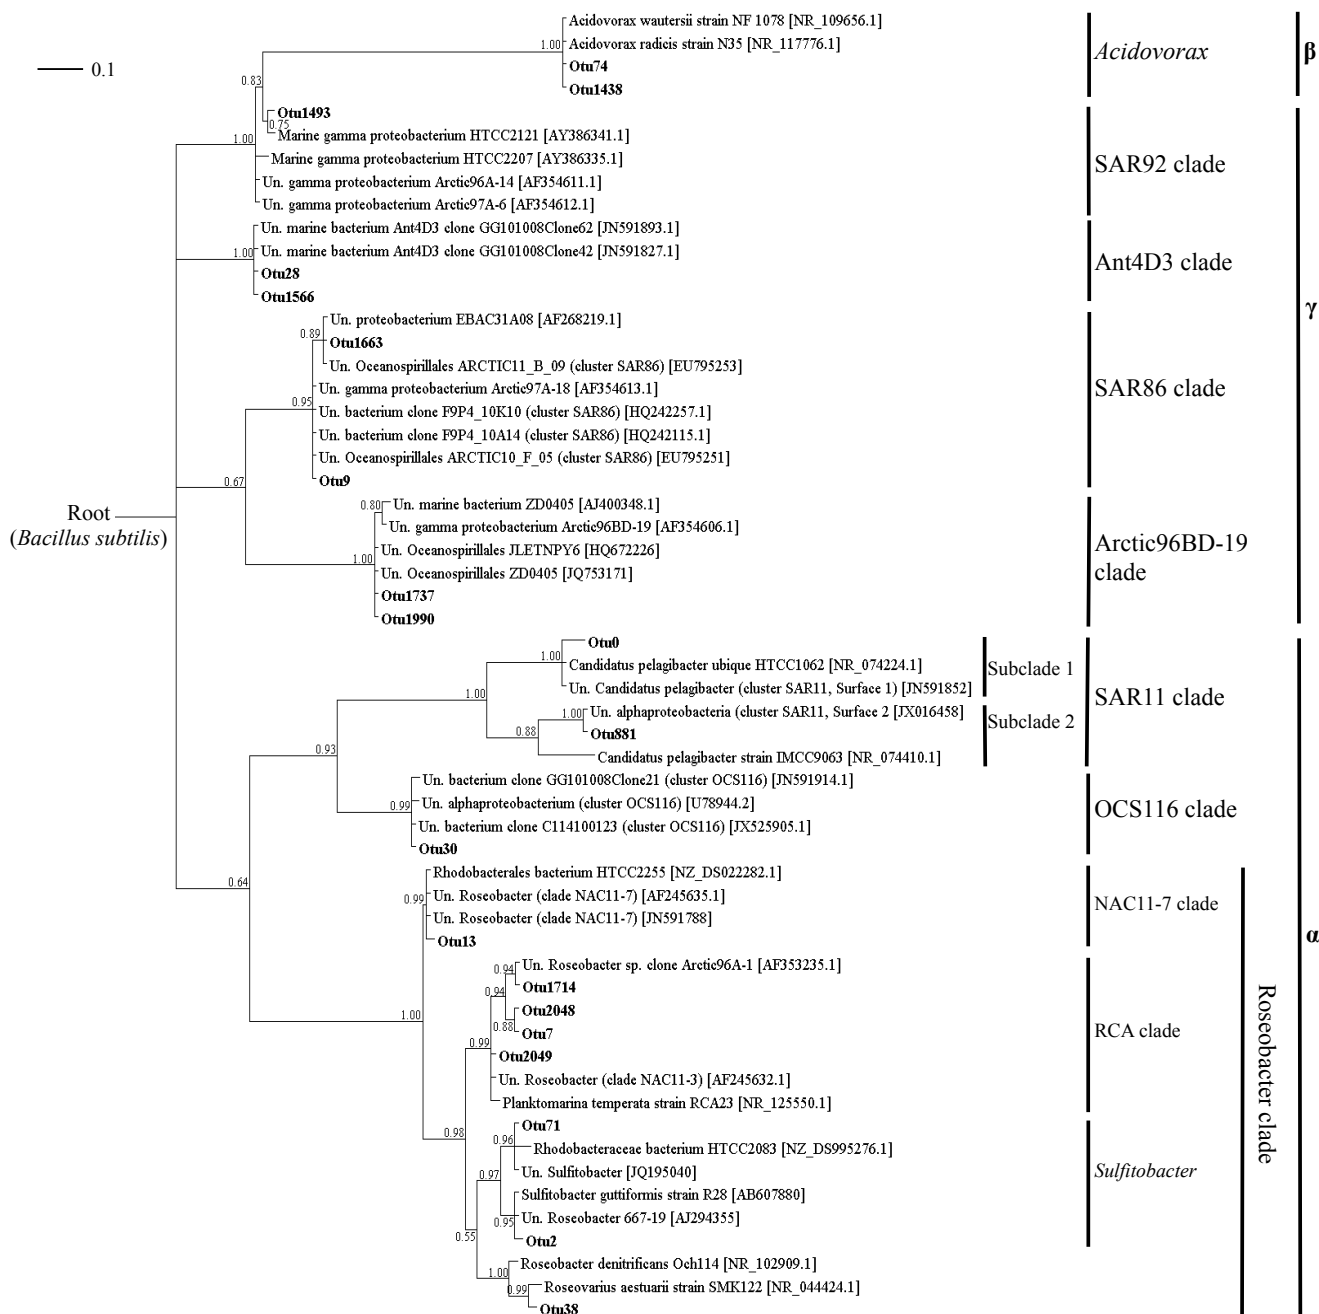

# Bacteroidetes

Fig. S4b

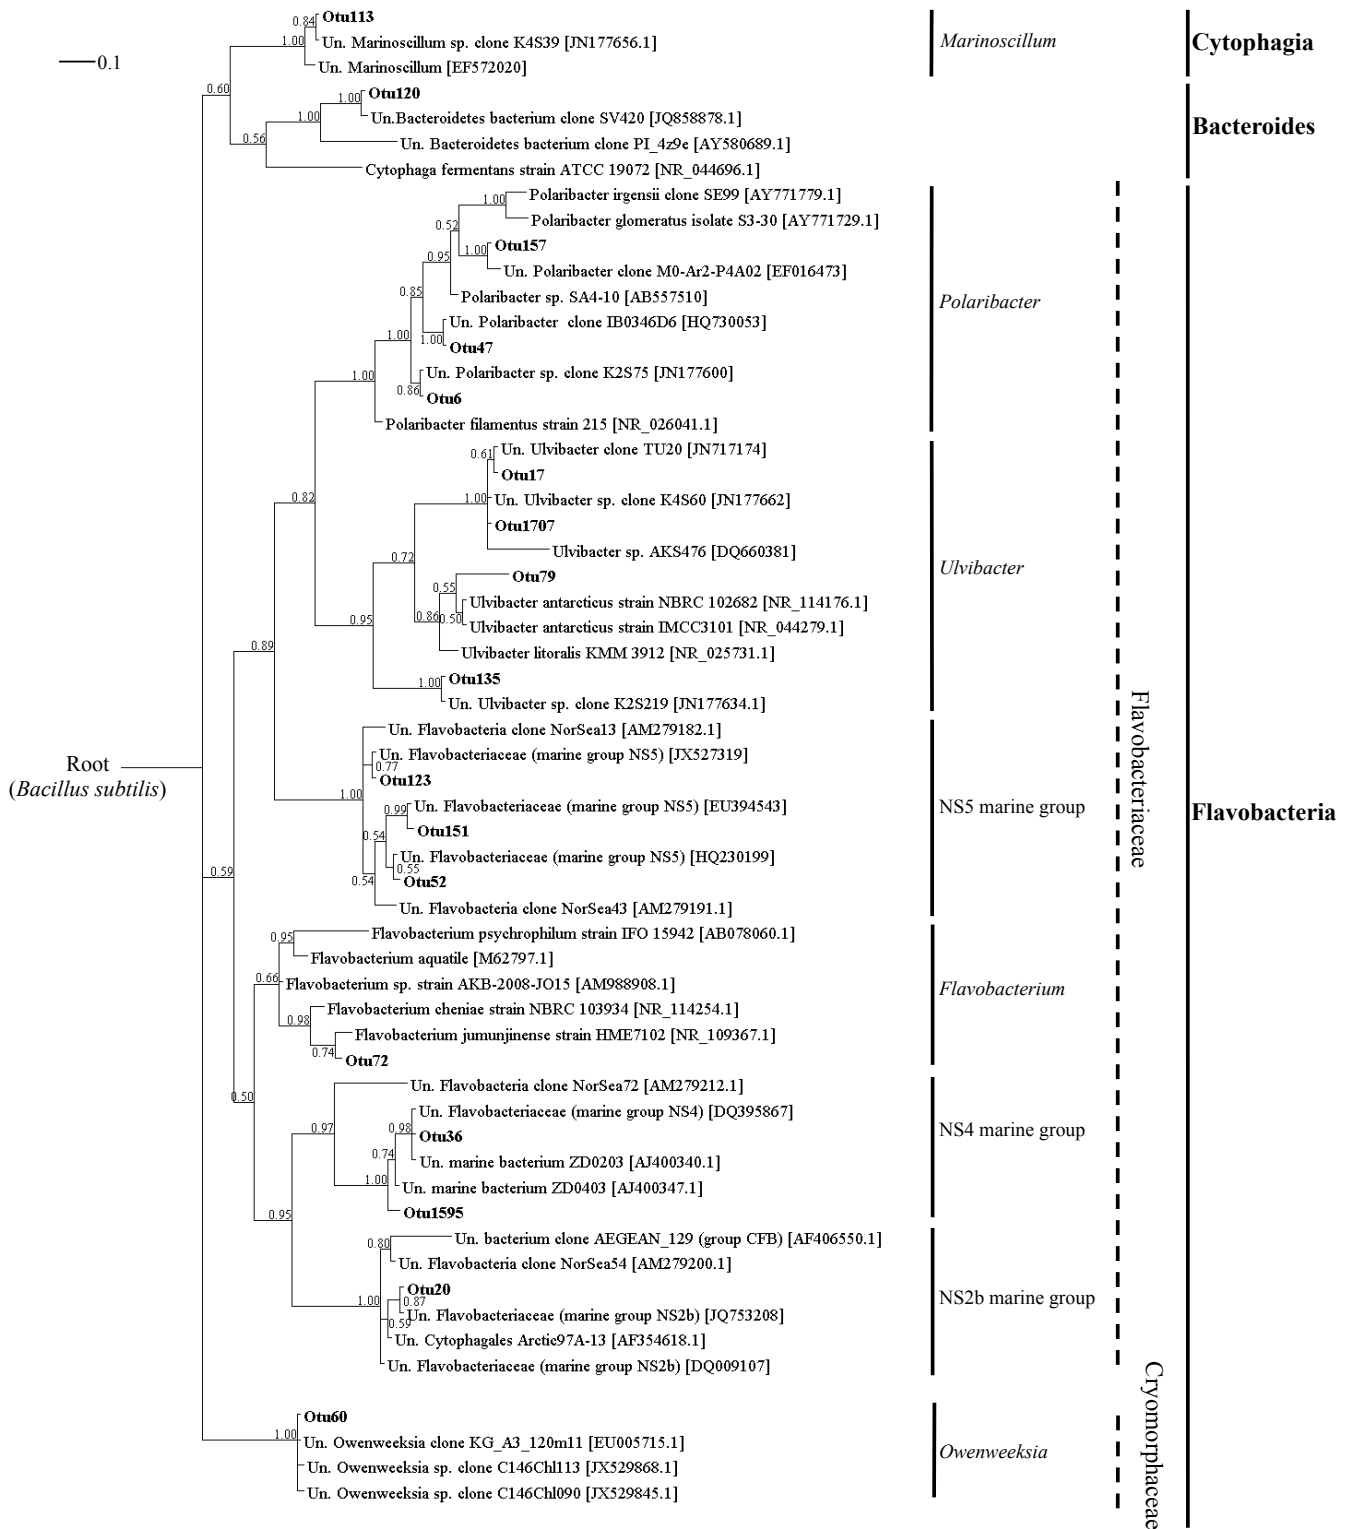

# Other groups

Fig. S4c

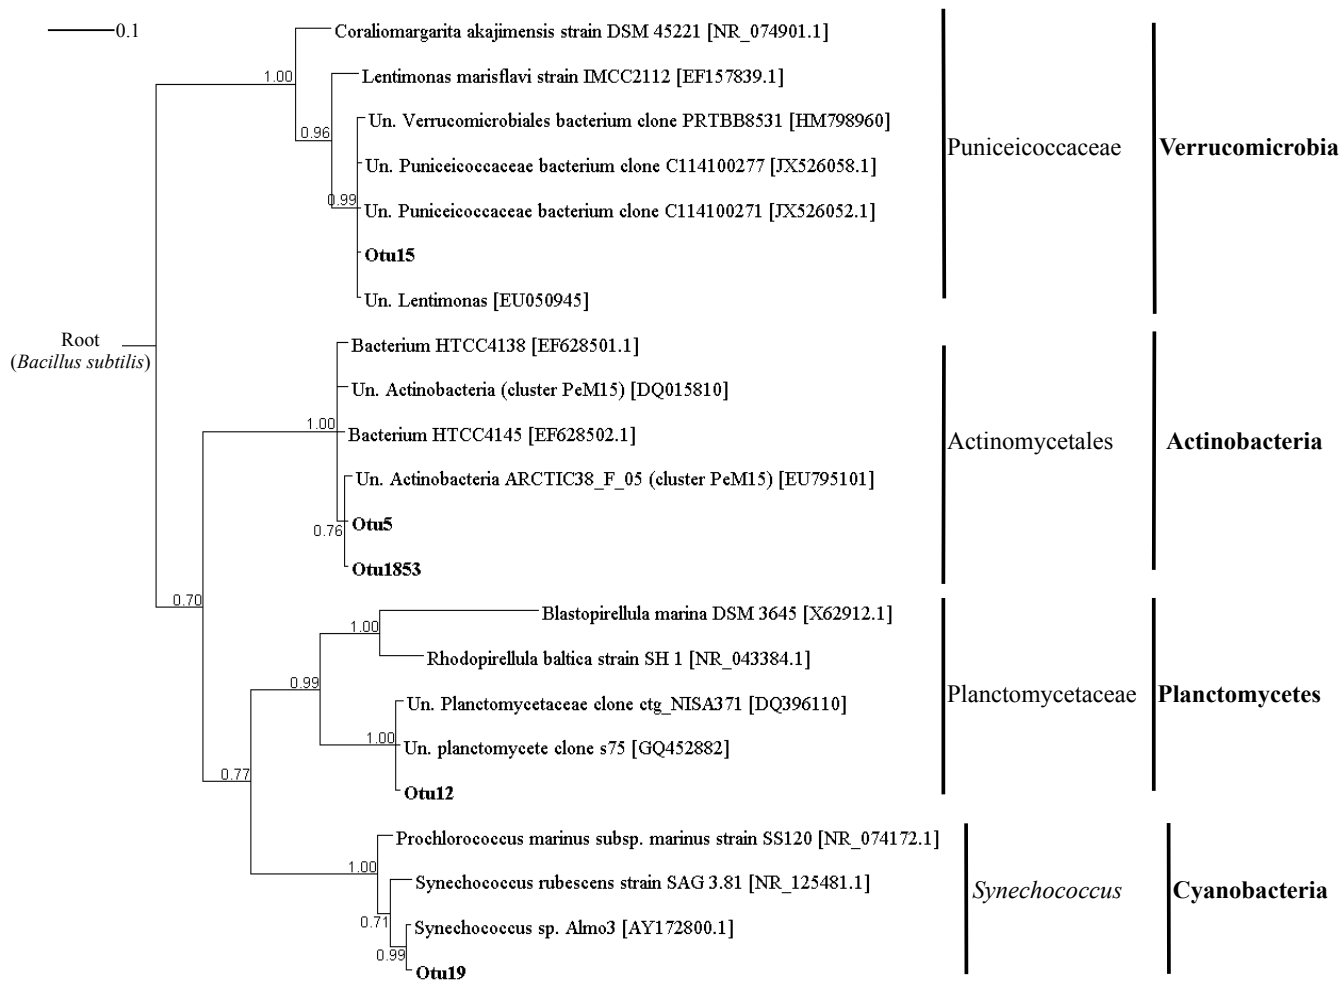

Supplement: ismej2015105x11.pdf [file ismej2015105x11.pdf]

Fig. S5

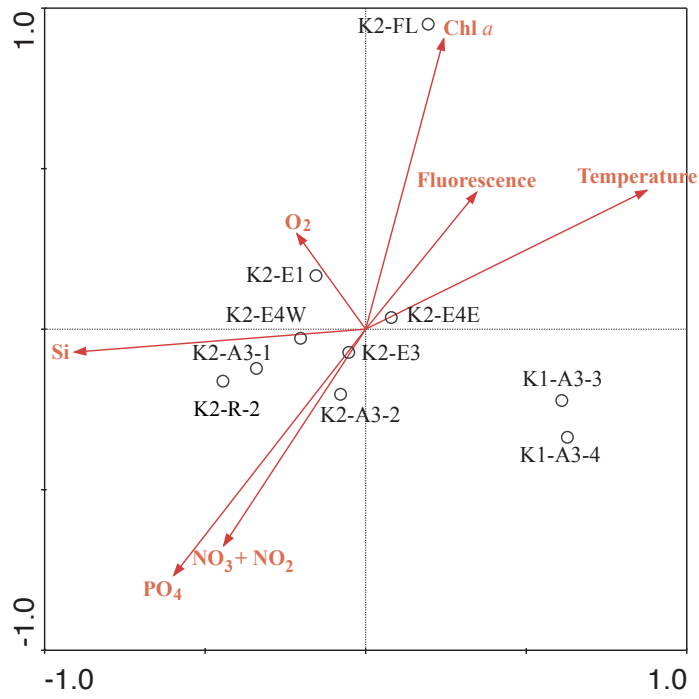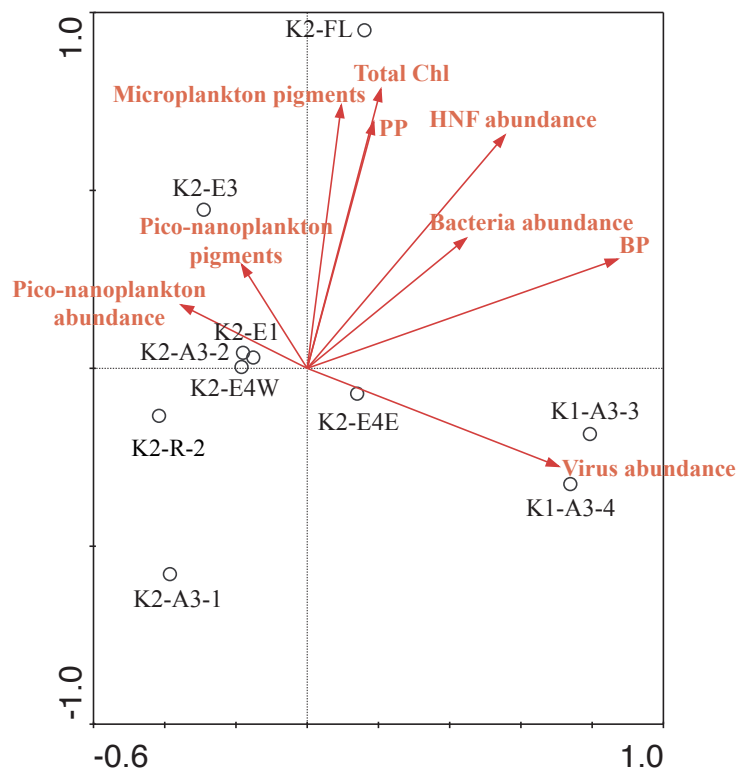

Supplement: ismej2015105x12.pdf [file ismej2015105x12.pdf]

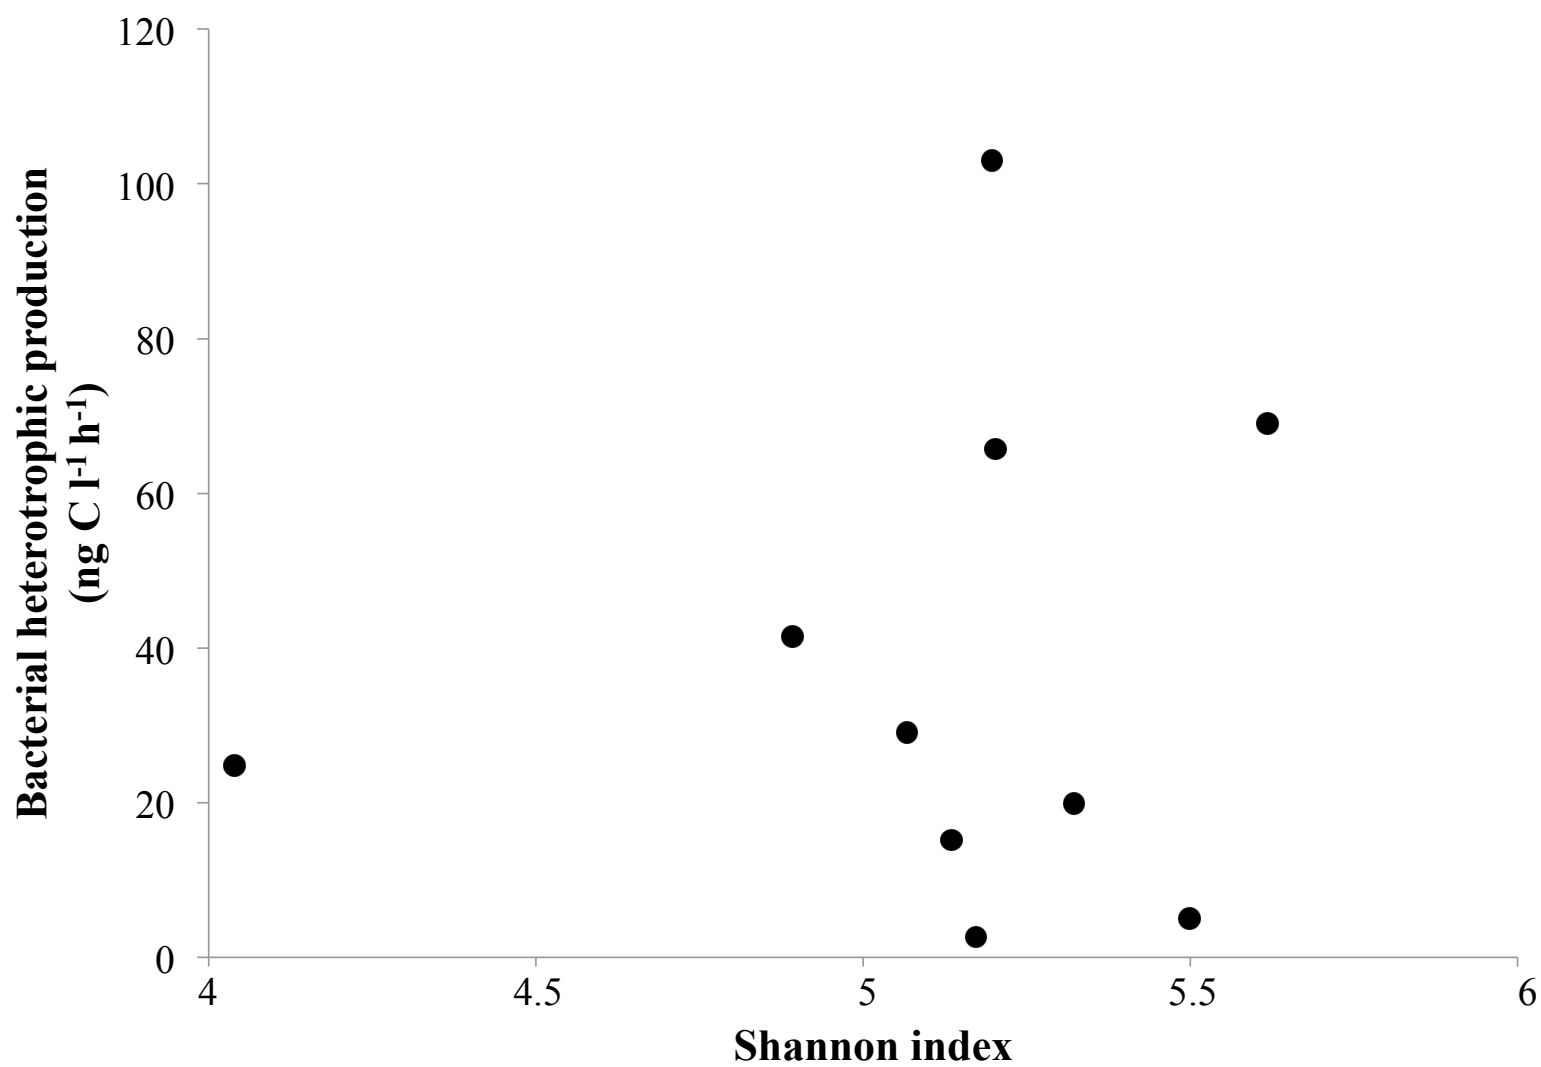

Supplement: ismej2015105x13.pdf [file ismej2015105x13.pdf]

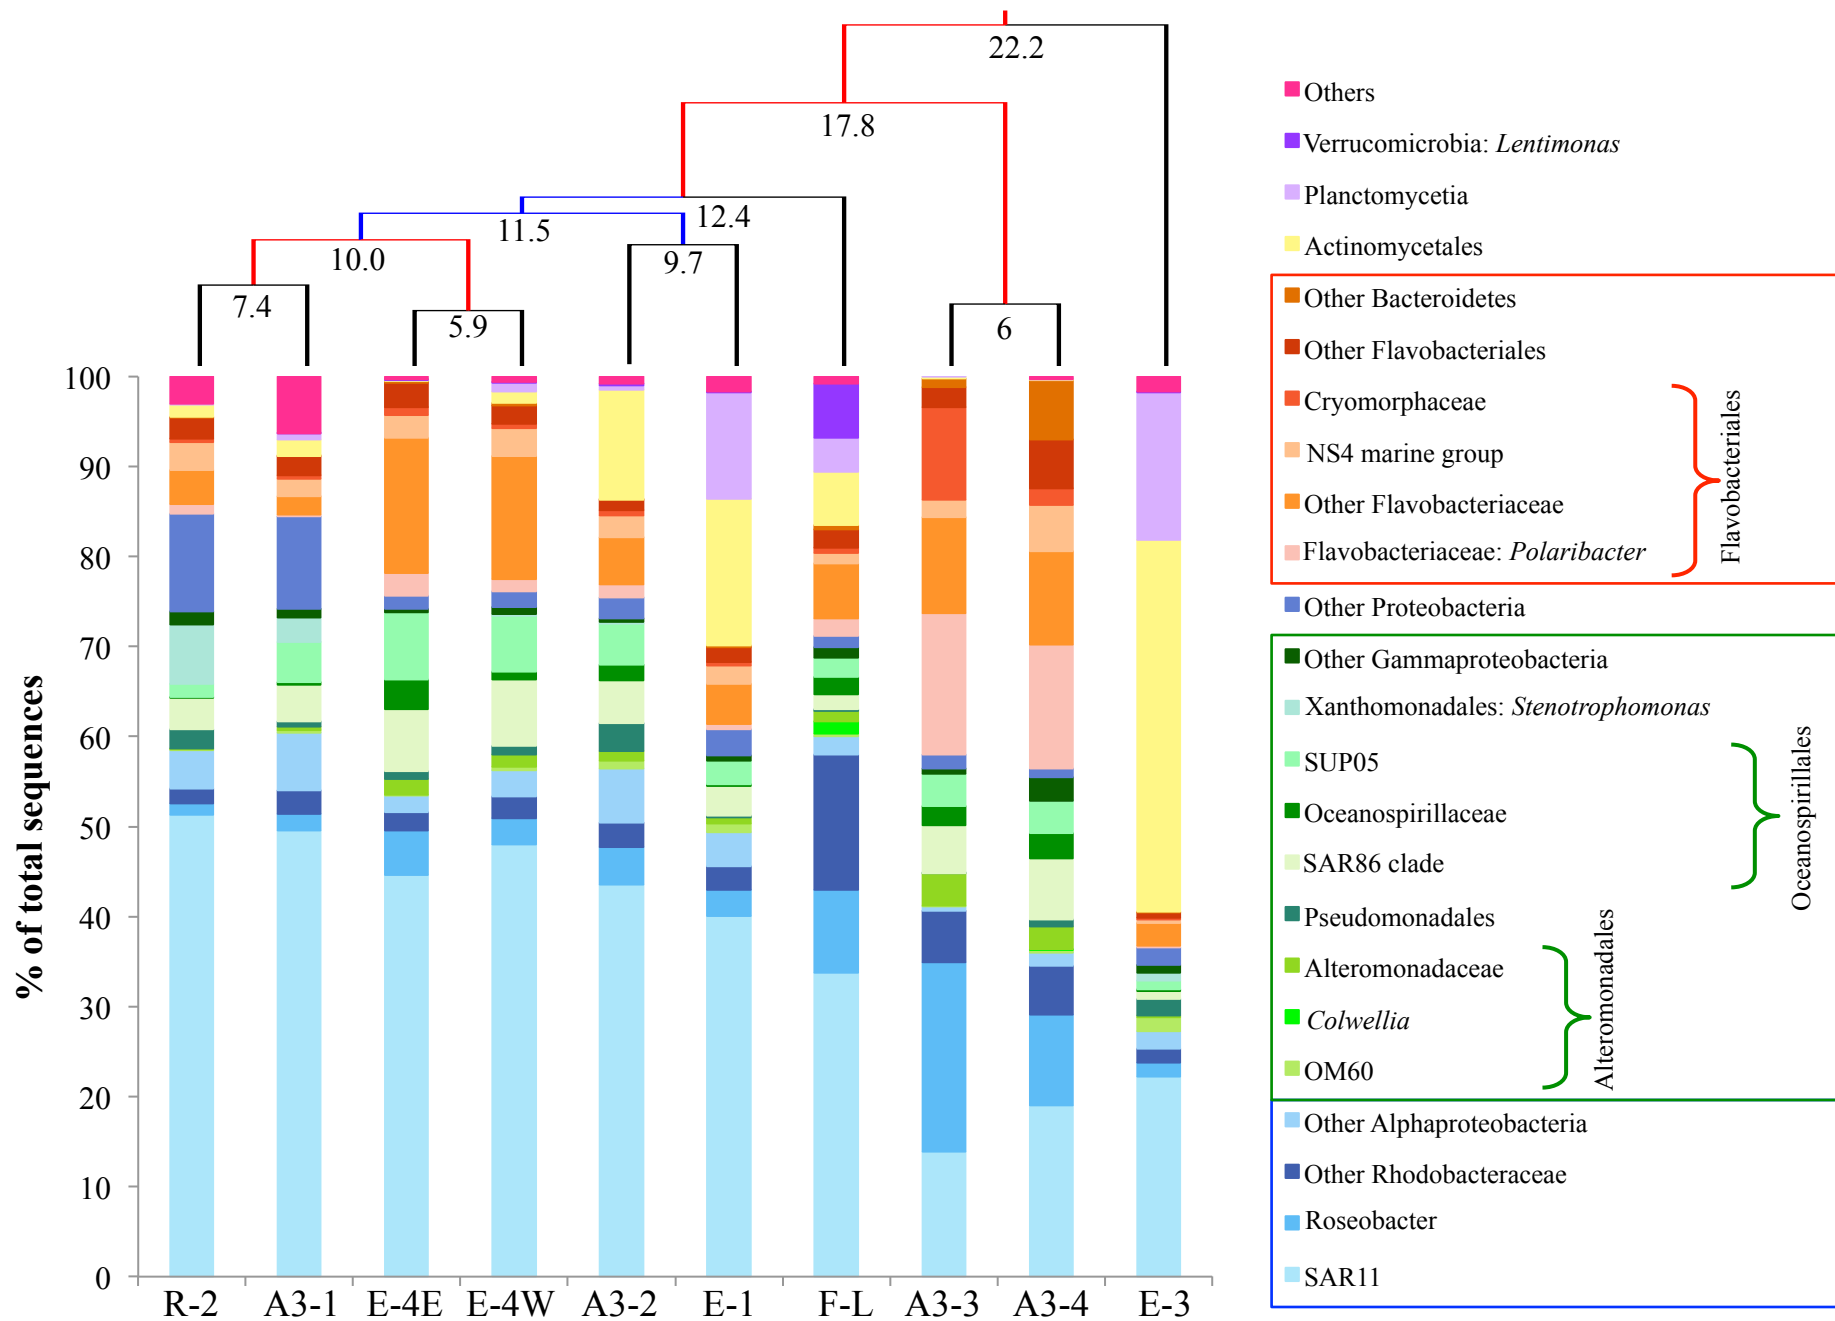

Supplement: ismej2015105x8.pdf [file ismej2015105x8.pdf]

Fig. S2

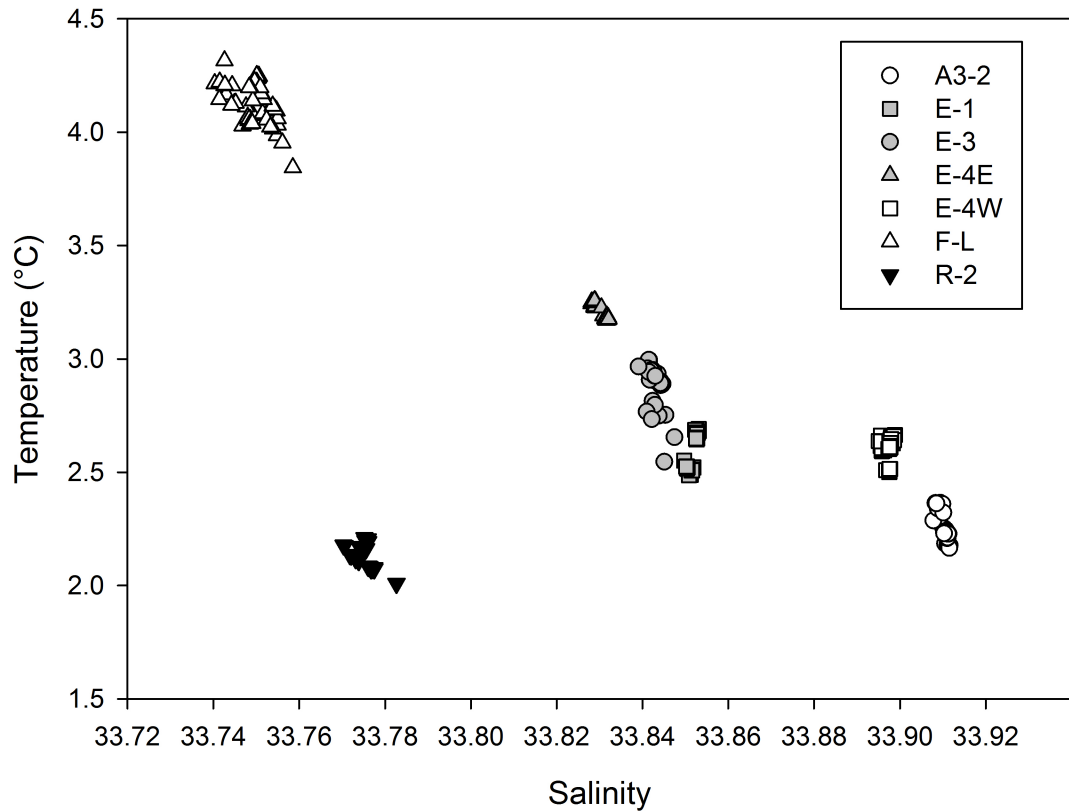

Supplement: ismej2015105x9.pdf [file ismej2015105x9.pdf]
